# Supplementary material for: Netrin-1 promotes gastric cancer cell proliferation and invasion via the receptor neogenin through PI3K/AKT signaling pathway
Source: PubMed Central journal article supplement (PMC5584240; doi:10.18632/oncotarget.17750), 2017-05-10
Supplement: oncotarget-08-51177-s001.pdf [file oncotarget-08-51177-s001.pdf]

## Netrin-1 promotes gastric cancer cell proliferation and invasion via the receptor neogenin through PI3K/AKT signaling pathway

### Supplementary Materials

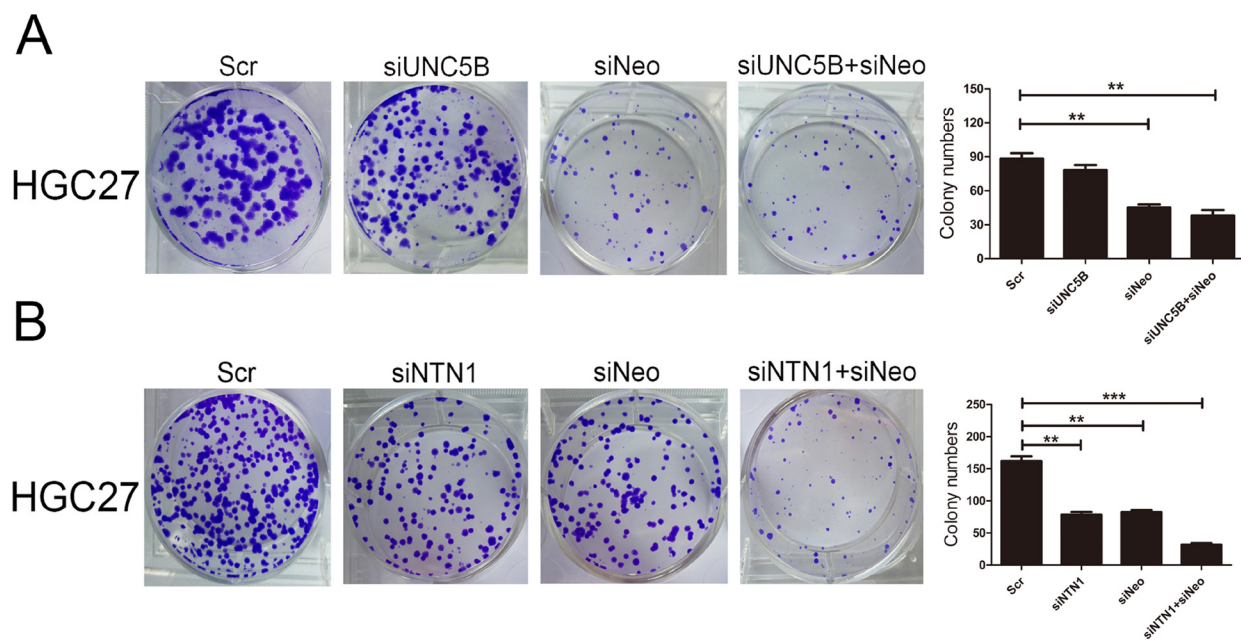

**Supplementary Figure 1: GC cells proliferation ability was mediated by neogenin.** (A) HGC27 cells were transfected with control, UNC5B, and neogenin siRNA. Colony formation assay showed that neogenin silencing suppressed cells proliferation in HGC27 cells, while UNC5B silencing has no effect. (B) HGC27 cells were transfected with control, netrin-1, and neogenin siRNA. Colony formation assay showed that combination of netrin-1 and neogenin siRNA significantly suppressed cells proliferation. \* $p < 0.05$ , \*\* $p < 0.01$ , \*\*\* $p < 0.001$ .

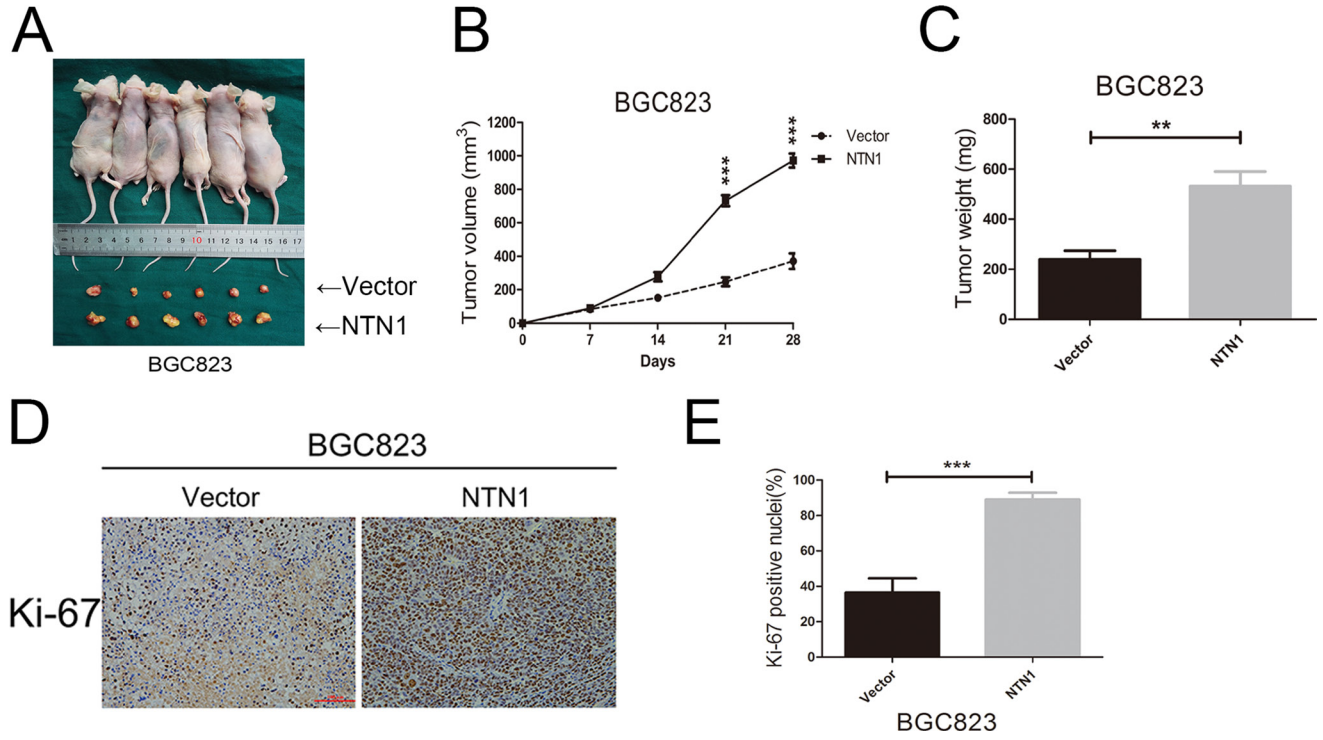

**Supplementary Figure 2: Netrin-1 overexpression promoted GC cells growth *in vivo*.** (A) After being transfected with lentivirus, BGC823 cells with netrin-1 overexpression and control cells were injected into flanks of nude mice, and the mice were sacrificed after 4 weeks. (B, C) Tumor volumes and tumor weights were examined in BGC823 groups at 5 different time points. (D, E) Xenograft tumors were obtained and then the samples were fixed and embedded in paraffin for immunohistochemical staining targeting Ki-67. Ki-67 positive nuclei rates for BGC823 were calculated by Image pro plus. Original magnification, 200×; Scale bar = 100μm. \* $p < 0.05$ , \*\* $p < 0.01$ , \*\*\* $p < 0.001$ .
